# Supplementary material for: Envisioning Happy Places for All: A Systematic Review of the Impact of Transformations in the Urban Environment on the Wellbeing of Vulnerable Groups
Source: MDPI journal article supplement (doi:10.3390/su13148086), 2021-07-20
Supplement: s1 [file s1]

## Systematic Review

**Title:** Envisioning Happy Places For All: A systematic review of the impact of transformations in the urban environment on the wellbeing of vulnerable groups

Supplementary File S3 – Table of Study characteristics

| Authors                                                                                      | Year of publication | Context (city, country) | Site level of intervention | Sample                                                                                        | Population of interest                 | Intervention                                                                 | Population engaged in process | Study methods                                                                   | Outcome                                                                                                                                                             | Results                                                                                                                                           |
|----------------------------------------------------------------------------------------------|---------------------|-------------------------|----------------------------|-----------------------------------------------------------------------------------------------|----------------------------------------|------------------------------------------------------------------------------|-------------------------------|---------------------------------------------------------------------------------|---------------------------------------------------------------------------------------------------------------------------------------------------------------------|---------------------------------------------------------------------------------------------------------------------------------------------------|
| Afacan, Y. [33]                                                                              | 2015                | Ankara (Turkey)         | Neighbourhood              | N = 200 residents, randomly selected. 110 women and 90 men, age range: 22-88                  | Older people<br>Families with children | Neighbourhood regeneration via development of housing and roads              | No                            | Quantitative: survey                                                            | Wellbeing as belonging and agency - Satisfaction with physical and social aspects of neighbourhood after regeneration (ad-hoc measure)                              | Older residents less satisfied with traffic safety and crime than young residents. Married residents with children unsatisfied with accessibility |
| Anthun, K.S., Maass, R.E.K., Hope, S., Espnes, G.A., Bell, R., Khan, M., Lillefjell, M. [34] | 2019                | Malvik (Norway)         | Road level                 | 2-Wave Survey: N = 989 W1; N = 2072 W2. Interviews: N = 14<br>All adult residents in the area | Low income or socioeconomic status     | Improvements to walking/cycling path linking residential area to town centre | Partially                     | Mixed-method - questionnaire surveys and structured interviews + digital counts | Wellbeing as Agency - Satisfaction with the availability and 'quality of neighbourhood resources' was measured using single items describing assessments of outdoor | Low SES least satisfied with availability and quality despite high use. Role of location, quality and availability of paths.                      |

| Authors                                                                                                         | Year of publication | Context (city, country)                                 | Site level of intervention | Sample                                                                                                                          | Population of interest                               | Intervention                                                                                           | Population engaged in process | Study methods                                                                         | Outcome                                                                                                                                        | Results                                                                                                                                  |
|-----------------------------------------------------------------------------------------------------------------|---------------------|---------------------------------------------------------|----------------------------|---------------------------------------------------------------------------------------------------------------------------------|------------------------------------------------------|--------------------------------------------------------------------------------------------------------|-------------------------------|---------------------------------------------------------------------------------------|------------------------------------------------------------------------------------------------------------------------------------------------|------------------------------------------------------------------------------------------------------------------------------------------|
|                                                                                                                 |                     |                                                         |                            |                                                                                                                                 |                                                      |                                                                                                        |                               |                                                                                       | facilities (nature contact and seaside facilities), facilities for physical activity, and cycle paths.                                         |                                                                                                                                          |
| Beebeejaun, Y. [35]                                                                                             | 2009                | London, Manchester, Bristol and Wolverhampton (England) | Community                  | Sample size or demographics not specified                                                                                       | Women                                                | Community development through User-driven identification of security and safety in public urban spaces | Full                          | Qualitative: interviews, naturalistic observations                                    | Wellbeing as agency, perceived safety (Fear O Meter, a simple visual device where women record contributing factors to feeling safe or unsafe) | Design factors that influence natural surveillance on the street, such as lighting and landscaping, affect women's perceptions of safety |
| Foley, L., Prins, R., Ogilvie, D., Crawford, F., Humphreys, D., Mitchell, R., Sahlqvist, S., & Thomson, H. [36] | 2017                | Glasgow (Scotland)                                      | Urban road infrastructure  | All adult residents in the area<br>Long cohort N = 365.<br>Repeat cross-section T1 N = 980, T2 = 978.<br>Full T2 sample = 1,343 | Comparisons of deprived and non-deprived communities | 8Km extension to an urban motorway                                                                     | Partially                     | Quantitative: Quasi-experimental evaluation (survey + health records) at 2 timepoints | Mental wellbeing: Warwick-Edinburgh Mental Well-being Scale; SF-8                                                                              | Living near to either a newly constructed or an existing urban motorway had a negative impact on residents' mental wellbeing. I          |

| Authors                                                                                                                                                | Year of publication | Context (city, country)              | Site level of intervention            | Sample                                       | Population of interest                          | Intervention                                                                                                                      | Population engaged in process | Study methods                                                                                                            | Outcome                                                                         | Results                                                                                                           |
|--------------------------------------------------------------------------------------------------------------------------------------------------------|---------------------|--------------------------------------|---------------------------------------|----------------------------------------------|-------------------------------------------------|-----------------------------------------------------------------------------------------------------------------------------------|-------------------------------|--------------------------------------------------------------------------------------------------------------------------|---------------------------------------------------------------------------------|-------------------------------------------------------------------------------------------------------------------|
| Gosling, V. [37]                                                                                                                                       | 2008                | UK (city not named)                  | Neighbourhood                         | 21 women between 18-80 years old.            | Women                                           | Community regeneration: Housing redevelopment with refurbishment or demolition of buildings; refurbishing of public spaces        | Partially                     | Qualitative: participant observation, preliminary focus groups and interviews, followed up by semi-structured interviews | Wellbeing as belonging and agency (perceived social exclusion,, ad-hoc measure) | Reports on fear and isolation during the urban regeneration processes specially for lone mothers and older women. |
| Macmillan, A.K., Mackie, H., Hosking, J.E., Witten, K., Smith, M., Field, A., Woodward, A., Hoskins, R., Stewart, J., Van der Werf, B. & Baas, P. [38] | 2018                | Auckland (New Zealand)               | Walking/cycling road infrastructure   | N=360 children and N =720 adult participants | Children<br>Area-level low socioeconomic status | Retrofitting of walking and cycling infrastructure.                                                                               | Full                          | Mixed-methods - controlled before-after intervention.                                                                    | Wellbeing as agency: Residents' satisfaction.                                   | No outcomes of intervention reported, but co-creation highlighted as having positive impact on the process        |
| Pastor, M., & Morello-Frosch, R. [29]                                                                                                                  | 2014                | Multiple cities in, California (USA) | Metropolitan areas and Neighbourhoods | Sample size or demographics not specified    | Area-level low socioeconomic status             | Intervention: building healthy communities though urban design, compact development, walking/cycling infrastructure, green areas) | No                            | Review. No empirical study – it includes examples and cases studies and initiatives.                                     | Wellbeing as agency and belonging (not clear definition or measurement)         | Community involvement and bottom-up approach contributed to better wellbeing and less distress                    |
| Pérez del Pulgar, P.C., Anguelovski,                                                                                                                   | 2020                | Barcelona (Spain)                    | Two urban parks                       | Sample size or demographics not specified    | Children                                        | Creation of green play                                                                                                            | No                            | Qualitative - archival and ethnographic                                                                                  | Relational wellbeing (i.e., derived from                                        | Different conditions of access,                                                                                   |

| Authors                                           | Year of publication | Context (city, country) | Site level of intervention | Sample                                      | Population of interest              | Intervention                                                         | Population engaged in process | Study methods                                                                                                               | Outcome                                                                                                                                                                 | Results                                                                                                                                                                                                     |
|---------------------------------------------------|---------------------|-------------------------|----------------------------|---------------------------------------------|-------------------------------------|----------------------------------------------------------------------|-------------------------------|-----------------------------------------------------------------------------------------------------------------------------|-------------------------------------------------------------------------------------------------------------------------------------------------------------------------|-------------------------------------------------------------------------------------------------------------------------------------------------------------------------------------------------------------|
| I., & Connolly, J. [39]                           |                     |                         |                            |                                             |                                     | spaces in two neighbourhoods                                         |                               | observation methods                                                                                                         | social relations, connections, interactions)                                                                                                                            | utilisation and socio-material design of the two parks influence children relational wellbeing, free play and observed contact with nature. Diversity of design promotes play more than unstructured green. |
| Semenza, J.C., March, T.L., & Bontempo, B.D. [40] | 2007                | Portland, Oregon (USA)  | Three neighbourhoods       | N=674, over 21 years old. 55% women, 45%men | Area-level low socioeconomic status | Ecological urban renewal and construction of attractive urban places | Full                          | Mixed methods: Workshops: situation analysis and extensive outreach to community members, and survey pre/post intervention. | Depression (CESD-11),<br>Wellbeing (SF-36),<br>Social capital as measure of belonging (ad-hoc measure of sense of community, social interaction, perceived control, and | High sense of community (well-developed sense of place), low social interaction. Increase in social capital and decrease in depression.                                                                     |

| Authors                                         | Year of publication | Context (city, country)                                        | Site level of intervention | Sample                                                                                                                                                                     | Population of interest              | Intervention                    | Population engaged in process | Study methods                                  | Outcome                                                                                                                                                                       | Results                                                                                                                                                                                                                                                                                                                                                                                                        |
|-------------------------------------------------|---------------------|----------------------------------------------------------------|----------------------------|----------------------------------------------------------------------------------------------------------------------------------------------------------------------------|-------------------------------------|---------------------------------|-------------------------------|------------------------------------------------|-------------------------------------------------------------------------------------------------------------------------------------------------------------------------------|----------------------------------------------------------------------------------------------------------------------------------------------------------------------------------------------------------------------------------------------------------------------------------------------------------------------------------------------------------------------------------------------------------------|
|                                                 |                     |                                                                |                            |                                                                                                                                                                            |                                     |                                 |                               |                                                | neighbourhood participation)                                                                                                                                                  |                                                                                                                                                                                                                                                                                                                                                                                                                |
| Ward Thompson, C., Aspinall, P.; & Roe, J. [41] | 2014                | Glasgow (study 1)<br>Edinburgh and Dundee (Study 2) (Scotland) | Urban woodlands            | Two case studies 1) Community that experienced change compared to community that did not experience change. 2) impact on stress of living in areas with more or less green | Area-level low socioeconomic status | Improvements to urban woodlands | Partially                     | Mixed-methods<br>Repeat Cross-sectional survey | Wellbeing (Warwick-Edinburgh Mental Wellbeing Scale)<br><br>Stress (Perceived Stress Scale)<br><br>Agency - Satisfaction with neighbourhood quality of life (ad hoc measure). | Higher levels of access to green areas relate with lower levels of stress and mental wellbeing for both men and women. Social contact in green spaces is linked with lower levels of stress for both and higher levels of wellbeing just in men not for women. In Dundee the stress levels were associated with the quantity of green space and not so much with the quality according to the cortisol survey. |
