# Supplementary material for: Envisioning Happy Places for All: A Systematic Review of the Impact of Transformations in the Urban Environment on the Wellbeing of Vulnerable Groups
Source: MDPI journal article supplement (doi:10.3390/su13148086), 2021-07-20
Supplement: s1 [file s1]

## Systematic Review

**Title:** Envisioning Happy Places For All: A systematic review of the impact of transformations in the urban environment on the wellbeing of vulnerable groups

### Supplementary File S4 – Risk of bias assessment

**Tool:** Mixed Methods Appraisal Tool (MMAT)

**Judgment:** Yes (green), No (red), Can't tell (yellow)

#### Qualitative studies

| Study                          | S1. Are there clear research questions? | S2. Do the collected data allow to address the research questions? | 1.1 Is the qualitative approach appropriate to answer the research question? | 1.2 Are the qualitative data collection methods adequate to address the research question? | 1.3. Are the findings adequately derived from the data? | 1.4. Is the interpretation of results sufficiently substantiated by data? | 1.5. Is there coherence between qualitative data sources, collection, analysis and interpretation? |
|--------------------------------|-----------------------------------------|--------------------------------------------------------------------|------------------------------------------------------------------------------|--------------------------------------------------------------------------------------------|---------------------------------------------------------|---------------------------------------------------------------------------|----------------------------------------------------------------------------------------------------|
| Beebeejaun (2009)              | Yes                                     | Yes                                                                | Yes                                                                          | Can't tell                                                                                 | Yes                                                     | Yes                                                                       | Yes                                                                                                |
| Gosling (2008)                 | Yes                                     | Yes                                                                | Yes                                                                          | Yes                                                                                        | Yes                                                     | Yes                                                                       | Yes                                                                                                |
| Pastor (2014)                  | Can't tell                              | Yes                                                                | Can't tell                                                                   | Can't tell                                                                                 | Can't tell                                              | Can't tell                                                                | Can't tell                                                                                         |
| Peréz del Pulgar et al. (2020) | Yes                                     | Yes                                                                | Yes                                                                          | Yes                                                                                        | Yes                                                     | Yes                                                                       | Yes                                                                                                |

### Quantitative non-randomised studies

| Study                 | S1. Are there clear research questions? | S2. Do the collected data allow to address the research questions? | 3.1. Are the participants representative of the target population? | 3.2. Are measurements appropriate regarding both the outcome and intervention (or exposure)? | 3.3. Are there complete outcome data? | 3.4. Are the confounders accounted for in the design and analysis? | 3.5. During the study period, is the intervention administered (or exposure occurred) as intended? |
|-----------------------|-----------------------------------------|--------------------------------------------------------------------|--------------------------------------------------------------------|----------------------------------------------------------------------------------------------|---------------------------------------|--------------------------------------------------------------------|----------------------------------------------------------------------------------------------------|
| Foley et al. (2017)   | Yes                                     | Yes                                                                | Yes                                                                | Yes                                                                                          | Yes                                   | Yes                                                                | Yes                                                                                                |
| Semenza et al. (2007) | Yes                                     | Yes                                                                | Can't tell                                                         | Yes                                                                                          | Yes                                   | Can't tell                                                         | Yes                                                                                                |

### Quantitative descriptive

| Study         | S1. Are there clear research questions? | S2. Do the collected data allow to address the research questions? | 4.1. Is the sampling strategy relevant to address the research question? | 4.2. Is the sample representative of the target population? | 4.3. Are the measurements appropriate? | 4.4. Is the risk of nonresponse bias low? | 4.5. Is the statistical analysis appropriate to answer the research question? |
|---------------|-----------------------------------------|--------------------------------------------------------------------|--------------------------------------------------------------------------|-------------------------------------------------------------|----------------------------------------|-------------------------------------------|-------------------------------------------------------------------------------|
| Afacan (2015) | Yes                                     | Yes                                                                | Yes                                                                      | Yes                                                         | Yes                                    | Yes                                       | Yes                                                                           |

**Mixed-Methods studies**

| <b>Study</b>                | <b>S1. Are there clear research questions?</b> | <b>S2. Do the collected data allow to address the research questions?</b> | <b>5.1. Is there an adequate rationale for using a mixed methods design to address the research question?</b> | <b>5.2. Are the different components of the study effectively integrated to answer the research question?</b> | <b>5.3. Are the outputs of the integration of qualitative and quantitative components adequately interpreted?</b> | <b>5.4. Are divergences and inconsistencies between quantitative and qualitative results adequately addressed?</b> | <b>5.5. Do the different components of the study adhere to the quality criteria of each tradition of the methods involved?</b> |
|-----------------------------|------------------------------------------------|---------------------------------------------------------------------------|---------------------------------------------------------------------------------------------------------------|---------------------------------------------------------------------------------------------------------------|-------------------------------------------------------------------------------------------------------------------|--------------------------------------------------------------------------------------------------------------------|--------------------------------------------------------------------------------------------------------------------------------|
| Anthun et al. (2019)        | Yes                                            | Yes                                                                       | Yes                                                                                                           | Yes                                                                                                           | Yes                                                                                                               | Yes                                                                                                                | Yes                                                                                                                            |
| MacMillan et al. (2018)     | Yes                                            | Can't tell                                                                | Yes                                                                                                           | Yes                                                                                                           | Can't tell                                                                                                        | Can't tell                                                                                                         | Yes                                                                                                                            |
| Ward Thompson et al. (2014) | Yes                                            | Yes                                                                       | Yes                                                                                                           | Yes                                                                                                           | Yes                                                                                                               | Yes                                                                                                                | Yes                                                                                                                            |
