# Supplementary material for: Envisioning Happy Places for All: A Systematic Review of the Impact of Transformations in the Urban Environment on the Wellbeing of Vulnerable Groups
Source: MDPI journal article supplement (doi:10.3390/su13148086), 2021-07-20
Supplement: s1 [file s1]

## Systematic Review

**Title:** Envisioning Happy Places For All: A systematic review of the impact of transformations in the urban environment on the wellbeing of vulnerable groups

### Supplementary File S2 – Inclusion criteria and searches

#### Order of criteria for exclusion:

1. Wrong population
2. Wrong intervention (not urban design or planning)
3. Wrong context (if not urban)
4. Wrong outcome
5. Wrong publication
6. Wrong study design
7. Wrong language

| PICOS Dimension                                                                           | Inclusion Criteria                                                                                                                                                                                                                                                                 | Exclusion Criteria                                                                                                                                                                                     |
|-------------------------------------------------------------------------------------------|------------------------------------------------------------------------------------------------------------------------------------------------------------------------------------------------------------------------------------------------------------------------------------|--------------------------------------------------------------------------------------------------------------------------------------------------------------------------------------------------------|
| Population – Vulnerable communities                                                       | Gender – women & men<br>Age – children and older people<br>Functional status – People with disabilities (physical, sensory, mental, hidden)<br>Socio-economic status (income, access to education)<br>Race<br>Ethnic status                                                        | Religious beliefs<br>Sexual orientation<br>Political orientation                                                                                                                                       |
| Exposure - INTERVENTIONS<br>Experiences and views of changes in urban planning and design | Changes to physical aspects of environmental design of outdoor spaces, including <ul style="list-style-type: none"> <li>- Accessibility</li> <li>- Permeability</li> <li>- Street layout</li> <li>- Green infrastructure</li> <li>- Blue spaces</li> <li>- Architecture</li> </ul> | Changes we don't focus on: <ul style="list-style-type: none"> <li>- Social issues or social interventions</li> <li>- Health interventions</li> <li>- Lifestyle interventions</li> </ul>                |
| Exposure - CONTEXT                                                                        | The setting of interest include: <ul style="list-style-type: none"> <li>• Urban places (city, suburbs, villages)</li> <li>• Outdoor environments</li> </ul>                                                                                                                        | Settings to exclude: <ul style="list-style-type: none"> <li>- Indoor environments (Residential/Commercial)</li> <li>- Natural/wild/rural settings with no elements of urban design/planning</li> </ul> |
| Outcome – Wellbeing                                                                       | Mental wellbeing<br>Cognitive wellbeing                                                                                                                                                                                                                                            | General health<br>Physical health                                                                                                                                                                      |

|                     |                                                                                                                                                                                                                                                                                                                                                                                                                                 |                                                                                                                                    |
|---------------------|---------------------------------------------------------------------------------------------------------------------------------------------------------------------------------------------------------------------------------------------------------------------------------------------------------------------------------------------------------------------------------------------------------------------------------|------------------------------------------------------------------------------------------------------------------------------------|
|                     | <p>Psychological wellbeing<br/>Broader sense of “being well” in a place:</p> <ul style="list-style-type: none"> <li>- belonging (Place attachment, Place identity, sense of place, social wellbeing)</li> <li>- Agency (residential satisfaction, perceived safety, perceived quality)</li> </ul> <p>Other measures related to psychological wellbeing:</p> <ul style="list-style-type: none"> <li>- Quality of life</li> </ul> | Socio-economic status                                                                                                              |
| Study design        | Quantitative, qualitative or mixed-methods research involving citizens and users                                                                                                                                                                                                                                                                                                                                                | Studies for which the design is unclear or not stated                                                                              |
| Type of publication | <p>Any type of publication where:</p> <ul style="list-style-type: none"> <li>• Changes in urban design that have occurred are explored in terms of the impact the wellbeing on vulnerable groups, somehow assessed either quant, qual.</li> </ul> <p>OR</p> <ul style="list-style-type: none"> <li>• The experiences or perceptions of vulnerable groups are explored in relation to potential changes.</li> </ul>              | Any type of publication related to the topic but not clearly describing on one or more defined interventions as per above criteria |

### Database searches

#### Keywords

| Lived environment transformation | Wellbeing     | Experience |
|----------------------------------|---------------|------------|
| Just transition                  | Wellbeing     | Equity     |
| Urban transition                 | Belonging     | Equitable  |
| Urban renovation                 | Mental Health | Equalit*   |
| Urban retrofitting               | Stress        | inequalit* |
| Ecological integrity             | Anxiety       | inequit*   |

|                         |                  |             |
|-------------------------|------------------|-------------|
| Urban transform*        | Depression       | disparit*   |
| Urban design            | Happiness        | sustainable |
| Urban planning          | Mood             | Empower*    |
| Happy places            | Quality of life  |             |
| Community development   | Satisfaction     |             |
| Community intervention* | Flourishing      |             |
| Community building      | Cognitive health |             |
| Urban intervention*     |                  |             |

### Search String (based on Scopus)

(TITLE-ABS-KEY ("Just transition" OR "Urban transition" OR "Urban renovation" OR "Urban retrofit" OR "Ecological integrity" OR "Urban transform\*" OR "Urban design" OR "Urban planning" OR "Happy places" OR "Community development" OR "Community intervention\*" OR "Community building" OR "Urban intervention\*"))

AND

(TITLE-ABS-KEY (wellbeing OR belonging OR "Mental Health" OR stress OR anxiety OR depression OR "Happiness Mood" OR "Quality of life" OR satisfaction OR flourish\* OR "Cognitive health"))

AND

(TITLE-ABS-KEY (equity OR equitable OR equalit\* OR inequalit\* OR inequit\* OR disparit\* OR sustainable OR empower\*))

### Search results

| Database (27-29 Apr)    | Number of items |
|-------------------------|-----------------|
| Scopus                  | 1,496           |
| Web of Science          | 725             |
| Academic Search (EBSCO) | 772             |
| PsychInfo (EBSCO)       | 391             |
| PubMed                  | 181             |
